# Supplementary material for: Variants in COMT, CYP3A5, CYP2B6, and ABCG2 Alter Quetiapine Pharmacokinetics
Source: MDPI journal article supplement (doi:10.3390/pharmaceutics13101573), 2021-09-28
Supplement: s1 [file s1]

# Supplementary Materials: Variants in *COMT*, *CYP3A5*, *CYP2B6*, and *ABCG2* Alter Quetiapine Pharmacokinetics

Pablo Zubiaur \*, Paula Fernández-Campos, Marcos Navares-Gómez, Paula Soria-Chacartegui, Gonzalo Villapalos-García, Manuel Román, Gina Mejía-Abril, Dolores Ochoa and Francisco Abad-Santos \*

**Table S1.** Pharmacokinetic parameters based on CYP2D6 phenotype.

| CYP2D6 Phenotype | n  | AUC <sub>0-∞</sub> /DW<br>(kg ng h/mL mg) | SD     | C <sub>max</sub> /DW<br>(kg ng/mL mg) | SD     | t <sub>max</sub><br>(h) | SD   | t <sub>1/2</sub><br>(h) | SD   | V <sub>d</sub> /F <sub>w</sub><br>(L/kg) | SD    | Cl/F <sub>w</sub><br>(L/h kg) | SD   |
|------------------|----|-------------------------------------------|--------|---------------------------------------|--------|-------------------------|------|-------------------------|------|------------------------------------------|-------|-------------------------------|------|
| UM               | 5  | 570.24                                    | 239.69 | 224.9                                 | 143.35 | 1.7                     | 1.88 | 4.85                    | 0.54 | 14.28                                    | 6.82  | 2.08                          | 1.02 |
| NM               | 13 | 716.72                                    | 448.37 | 192.73                                | 86.27  | 0.99                    | 0.43 | 4.77                    | 1.11 | 12.82                                    | 8.03  | 1.93                          | 1.14 |
| IM               | 28 | 818.73                                    | 366.5  | 207.04                                | 86.58  | 1.49                    | 0.96 | 5.08                    | 1.29 | 10.59                                    | 4.55  | 1.59                          | 0.97 |
| PM               | 3  | 496.15                                    | 238.28 | 150.56                                | 61.11  | 0.78                    | 0.25 | 5.13                    | 0.71 | 18.55                                    | 11.87 | 2.47                          | 1.36 |
| Total            | 49 | 746.56                                    | 378.69 | 201.61                                | 90.57  | 1.34                    | 0.97 | 4.98                    | 1.14 | 12.05                                    | 6.49  | 1.78                          | 1.04 |

UM: ultrarapid metabolizer; NM: normal metabolizer; IM: intermediate metabolizer; PM: poor metabolizer.

**Table S2.** Pharmacokinetic parameters based on genotypes and phenotypes without statistically significant associations.

| Genotype or phenotype             | N       | AUC <sub>0-∞</sub> /DW<br>(kg*ng*h/mL mg) |         |        | C <sub>max</sub> /DW<br>(kg*ng/mL mg) |        | t <sub>max</sub><br>(h) |      | t <sub>1/2</sub> (h) |      | V <sub>d</sub> /F <sub>w</sub> (L/kg) |      | Cl/F <sub>w</sub><br>(L/h*kg) |      |
|-----------------------------------|---------|-------------------------------------------|---------|--------|---------------------------------------|--------|-------------------------|------|----------------------|------|---------------------------------------|------|-------------------------------|------|
|                                   |         | Mean                                      | SD      |        | Mean                                  | SD     | Mean                    | SD   | Mean                 | SD   | Mean                                  | SD   | Mean                          | SD   |
| <i>ABCB1</i> rs1128503 (C1236T)   | CC      | 19                                        | 722.34  | 360.38 | 195.60                                | 84.62  | 1.21                    | 1.08 | 5.11                 | 0.81 | 13.11                                 | 7.59 | 1.81                          | 1.01 |
|                                   | CT      | 20                                        | 771.22  | 426.79 | 202.28                                | 96.15  | 1.40                    | 0.83 | 5.05                 | 1.41 | 11.18                                 | 3.62 | 1.75                          | 1.05 |
|                                   | TT      | 10                                        | 743.29  | 343.47 | 211.68                                | 98.60  | 1.44                    | 1.09 | 4.60                 | 1.13 | 11.77                                 | 8.80 | 1.78                          | 1.20 |
| <i>ABCB1</i> rs1128503 (C3435T)   | CC      | 18                                        | 649.45  | 300.93 | 182.96                                | 80.42  | 1.22                    | 1.09 | 5.00                 | 0.86 | 13.79                                 | 7.48 | 1.93                          | 0.97 |
|                                   | CT      | 22                                        | 869.78  | 446.26 | 218.38                                | 94.91  | 1.50                    | 0.99 | 5.06                 | 1.35 | 10.07                                 | 3.68 | 1.57                          | 1.04 |
|                                   | TT      | 9                                         | 639.59  | 263.45 | 197.93                                | 101.30 | 1.18                    | 0.65 | 4.74                 | 1.19 | 13.38                                 | 8.86 | 1.98                          | 1.19 |
| <i>ABCB1</i> rs2032582 (G2677T/A) | GG      | 14                                        | 830.75  | 395.44 | 215.02                                | 70.53  | 1.38                    | 1.28 | 5.11                 | 0.86 | 10.76                                 | 5.14 | 1.52                          | 0.80 |
|                                   | GA      | 19                                        | 795.14  | 437.36 | 206.88                                | 101.19 | 1.47                    | 0.92 | 4.88                 | 1.46 | 10.69                                 | 3.95 | 1.73                          | 1.08 |
|                                   | GT      | 8                                         | 597.98  | 260.63 | 161.49                                | 86.63  | 1.11                    | 0.83 | 5.23                 | 0.65 | 16.01                                 | 9.30 | 2.11                          | 1.15 |
|                                   | AA      | 7                                         | 635.39  | 290.63 | 212.06                                | 111.00 | 1.12                    | 0.70 | 4.70                 | 1.33 | 13.78                                 | 9.88 | 2.07                          | 1.34 |
|                                   | AT      | 1                                         | 611.86  | 0.00   | 161.42                                | 0.00   | 1.50                    | 0.00 | 4.97                 | 0.00 | 11.89                                 | 0.00 | 1.65                          | 0.00 |
| <i>ABCC2</i> rs2273697            | GG      | 35                                        | 686.31  | 309.95 | 197.55                                | 85.00  | 1.23                    | 0.81 | 4.86                 | 1.13 | 12.37                                 | 6.53 | 1.88                          | 1.08 |
|                                   | GA      | 13                                        | 854.30  | 486.26 | 204.89                                | 107.06 | 1.62                    | 1.34 | 5.04                 | 0.78 | 11.46                                 | 6.77 | 1.60                          | 0.94 |
|                                   | AA      | 1                                         | 1455.04 | 0.00   | 300.92                                | 0.00   | 1.34                    | 0.00 | 8.42                 | 0.00 | 8.44                                  | 0.00 | 0.69                          | 0.00 |
| <i>COMT</i> rs4680                | GG      | 26                                        | 711.44  | 317.25 | 199.00                                | 98.68  | 1.43                    | 1.13 | 4.94                 | 0.83 | 12.43                                 | 6.62 | 1.79                          | 0.98 |
|                                   | GA      | 12                                        | 798.67  | 413.23 | 213.80                                | 76.35  | 1.20                    | 0.55 | 5.07                 | 1.54 | 11.42                                 | 7.50 | 1.69                          | 1.12 |
|                                   | AA      | 11                                        | 772.74  | 491.61 | 194.47                                | 91.46  | 1.28                    | 0.99 | 4.96                 | 1.39 | 11.83                                 | 5.43 | 1.86                          | 1.20 |
| <i>CYP1A2*1B</i> rs2470890        | *1/*1   | 7                                         | 816.67  | 358.84 | 197.68                                | 83.48  | 1.12                    | 0.85 | 5.32                 | 1.06 | 11.44                                 | 6.10 | 1.55                          | 0.92 |
|                                   | *1/*1B  | 22                                        | 760.98  | 463.01 | 206.62                                | 110.93 | 1.54                    | 1.25 | 4.73                 | 1.01 | 12.83                                 | 8.77 | 1.95                          | 1.31 |
|                                   | *1B/*1B | 20                                        | 706.17  | 284.45 | 197.48                                | 69.79  | 1.20                    | 0.59 | 5.14                 | 1.30 | 11.40                                 | 2.87 | 1.67                          | 0.71 |
| <i>CYP1A2*1C</i> rs2069514        | *1/*1   | 27                                        | 745.07  | 437.37 | 195.08                                | 99.26  | 1.47                    | 1.11 | 4.94                 | 1.03 | 13.23                                 | 8.18 | 1.94                          | 1.24 |
|                                   | *1/*1C  | 16                                        | 755.39  | 267.94 | 223.35                                | 79.44  | 1.13                    | 0.88 | 4.84                 | 1.11 | 9.92                                  | 2.77 | 1.50                          | 0.53 |
|                                   | *1C/*1C | 6                                         | 729.76  | 407.46 | 173.02                                | 76.56  | 1.28                    | 0.23 | 5.51                 | 1.72 | 12.40                                 | 3.33 | 1.82                          | 1.08 |
| <i>CYP1A2*1F</i> rs762551         | *1/*1   | 25                                        | 737.44  | 347.97 | 189.63                                | 86.32  | 1.28                    | 1.05 | 5.23                 | 1.14 | 12.69                                 | 6.84 | 1.77                          | 1.00 |
|                                   | *1/*1F  | 22                                        | 753.04  | 430.54 | 216.40                                | 98.97  | 1.37                    | 0.94 | 4.61                 | 1.10 | 11.40                                 | 6.43 | 1.83                          | 1.14 |
|                                   | *1F/*1F | 2                                         | 789.45  | 279.71 | 188.62                                | 22.29  | 1.75                    | 0.35 | 5.82                 | 0.73 | 11.23                                 | 2.77 | 1.39                          | 0.53 |
| <i>CYP2A6*9</i> rs28399433        | *1/*1   | 39                                        | 769.66  | 406.13 | 207.07                                | 95.29  | 1.37                    | 1.03 | 4.97                 | 1.22 | 11.96                                 | 6.86 | 1.79                          | 1.11 |
|                                   | *1/*9   | 6                                         | 718.89  | 253.92 | 158.63                                | 33.85  | 1.46                    | 0.83 | 5.09                 | 0.92 | 11.07                                 | 3.38 | 1.56                          | 0.57 |
|                                   | *9/*9   | 4                                         | 562.94  | 210.69 | 212.87                                | 100.39 | 0.81                    | 0.14 | 4.89                 | 0.75 | 14.35                                 | 6.97 | 2.05                          | 0.98 |
| <i>CYP2C19</i> phenotype          | UM      | 1                                         | 987.23  | 0.00   | 204.39                                | 0.00   | 1.50                    | 0.00 | 6.34                 | 0.00 | 9.27                                  | 0.00 | 1.01                          | 0.00 |
|                                   | RM      | 11                                        | 663.42  | 267.97 | 200.30                                | 65.50  | 1.15                    | 0.56 | 5.06                 | 0.80 | 13.31                                 | 7.16 | 1.82                          | 0.87 |
|                                   | NM      | 32                                        | 764.12  | 406.23 | 199.73                                | 98.99  | 1.38                    | 1.11 | 4.83                 | 0.99 | 11.73                                 | 6.77 | 1.76                          | 1.03 |
|                                   | IM      | 4                                         | 909.53  | 411.59 | 258.80                                | 55.46  | 1.04                    | 0.21 | 6.37                 | 1.49 | 11.37                                 | 4.12 | 1.30                          | 0.58 |
|                                   | PM      | 1                                         | 206.75  | 0.00   | 44.62                                 | 0.00   | 3.00                    | 0.00 | 1.98                 | 0.00 | 13.85                                 | 0.00 | 4.84                          | 0.00 |

|                      |        |    |         |        |        |        |      |      |      |      |       |      |      |      |
|----------------------|--------|----|---------|--------|--------|--------|------|------|------|------|-------|------|------|------|
| CYP2C8*2 rs11572103  | *1/*1  | 48 | 745.05  | 382.55 | 197.46 | 86.69  | 1.35 | 0.97 | 4.98 | 1.16 | 12.11 | 6.54 | 1.79 | 1.05 |
|                      | *1/*2  | 1  | 819.30  | 0.00   | 400.83 | 0.00   | 0.50 | 0.00 | 5.07 | 0.00 | 8.93  | 0.00 | 1.22 | 0.00 |
| CYP2C8*3             | *1/*1  | 37 | 686.68  | 334.67 | 192.16 | 84.43  | 1.26 | 0.88 | 4.84 | 1.11 | 12.20 | 5.73 | 1.85 | 0.97 |
|                      | *1/*3  | 11 | 996.50  | 417.97 | 245.88 | 96.63  | 1.63 | 1.28 | 5.46 | 1.25 | 9.55  | 5.36 | 1.27 | 0.80 |
|                      | *3/*3  | 1  | 213.10  | 0.00   | 64.21  | 0.00   | 1.00 | 0.00 | 4.94 | 0.00 | 34.01 | 0.00 | 4.78 | 0.00 |
| CYP2C8*4 rs1058930   | *1/*1  | 48 | 746.53  | 382.70 | 200.82 | 91.36  | 1.35 | 0.98 | 4.98 | 1.16 | 12.10 | 6.55 | 1.79 | 1.05 |
|                      | *1/*4  | 1  | 747.96  | 0.00   | 239.36 | 0.00   | 0.84 | 0.00 | 5.00 | 0.00 | 9.64  | 0.00 | 1.34 | 0.00 |
| CYP2C9 phenotype     | NM     | 1  | 819.30  | 0.00   | 400.83 | 0.00   | 0.50 | 0.00 | 5.07 | 0.00 | 8.93  | 0.00 | 1.22 | 0.00 |
|                      | IM     | 13 | 854.22  | 438.46 | 217.11 | 90.81  | 1.32 | 0.92 | 5.51 | 1.28 | 12.36 | 8.05 | 1.66 | 1.21 |
|                      | PM     | 35 | 704.50  | 358.05 | 190.16 | 85.30  | 1.37 | 1.01 | 4.78 | 1.06 | 12.02 | 6.01 | 1.84 | 1.00 |
| CYP3A4*22 rs35599367 | *1/*1  | 48 | 741.55  | 381.05 | 201.55 | 91.53  | 1.33 | 0.98 | 4.95 | 1.14 | 12.10 | 6.54 | 1.80 | 1.05 |
|                      | *1/*22 | 1  | 987.23  | 0.00   | 204.39 | 0.00   | 1.50 | 0.00 | 6.34 | 0.00 | 9.27  | 0.00 | 1.01 | 0.00 |
| CYP3A4*3 rs4986910   | *1/*1  | 48 | 731.80  | 368.18 | 199.54 | 90.35  | 1.34 | 0.98 | 4.91 | 1.04 | 12.12 | 6.53 | 1.80 | 1.04 |
|                      | *1/*3  | 1  | 1455.04 | 0.00   | 300.92 | 0.00   | 1.34 | 0.00 | 8.42 | 0.00 | 8.44  | 0.00 | 0.69 | 0.00 |
| SLC22A1*2 rs72552763 | *1/*1  | 27 | 746.47  | 397.47 | 208.56 | 92.05  | 1.32 | 1.06 | 4.99 | 1.31 | 11.96 | 6.29 | 1.80 | 1.10 |
|                      | *1/*2  | 21 | 716.52  | 343.21 | 194.07 | 92.22  | 1.26 | 0.75 | 4.92 | 0.93 | 12.42 | 6.92 | 1.81 | 0.99 |
|                      | *2/*2  | 1  | 1380.01 | 0.00   | 172.52 | 0.00   | 3.50 | 0.00 | 6.02 | 0.00 | 6.48  | 0.00 | 0.74 | 0.00 |
| SLC22A1*5 rs34059508 | *1/*1  | 48 | 749.37  | 382.18 | 202.45 | 91.34  | 1.33 | 0.98 | 4.98 | 1.16 | 12.05 | 6.56 | 1.78 | 1.05 |
|                      | *1/*5  | 1  | 611.86  | 0.00   | 161.42 | 0.00   | 1.50 | 0.00 | 4.97 | 0.00 | 11.89 | 0.00 | 1.65 | 0.00 |
| SLC28A3 rs7853758    | GG     | 30 | 788.94  | 399.27 | 195.23 | 92.67  | 1.46 | 1.11 | 5.04 | 1.22 | 11.90 | 6.89 | 1.79 | 1.20 |
|                      | GA     | 16 | 685.49  | 371.27 | 203.41 | 82.88  | 1.19 | 0.73 | 4.88 | 1.12 | 12.45 | 6.49 | 1.80 | 0.81 |
|                      | AA     | 3  | 648.51  | 158.90 | 255.78 | 125.68 | 0.86 | 0.32 | 4.88 | 0.49 | 11.30 | 2.07 | 1.63 | 0.42 |
| SLCO1B1 phenotype    | PF     | 3  | 775.45  | 199.81 | 306.34 | 141.59 | 0.61 | 0.10 | 4.21 | 1.01 | 7.84  | 1.09 | 1.37 | 0.40 |
|                      | DF     | 16 | 793.35  | 401.20 | 204.27 | 85.77  | 1.13 | 0.59 | 5.26 | 1.05 | 11.75 | 6.13 | 1.64 | 0.97 |
|                      | NF     | 28 | 733.78  | 387.39 | 197.46 | 81.24  | 1.46 | 1.13 | 5.04 | 1.08 | 12.76 | 7.10 | 1.81 | 1.01 |
| UGT1A4 rs2011425     | T/T    | 35 | 732.18  | 416.66 | 193.40 | 94.93  | 1.44 | 1.07 | 4.98 | 1.20 | 12.93 | 7.39 | 1.92 | 1.17 |
|                      | T/G    | 13 | 739.19  | 226.17 | 217.67 | 79.32  | 1.11 | 0.65 | 4.82 | 0.90 | 10.01 | 2.26 | 1.50 | 0.47 |
|                      | G/G    | 1  | 1345.98 | 0.00   | 280.23 | 0.00   | 0.84 | 0.00 | 7.00 | 0.00 | 7.64  | 0.00 | 0.75 | 0.00 |
| UGT2B15 rs1902023    | TT     | 10 | 833.41  | 453.26 | 219.49 | 96.80  | 1.44 | 1.01 | 5.11 | 1.30 | 10.58 | 3.52 | 1.69 | 1.22 |
|                      | TG     | 23 | 718.71  | 301.36 | 196.68 | 80.20  | 1.41 | 1.17 | 4.89 | 1.08 | 12.02 | 6.94 | 1.72 | 0.87 |
|                      | GG     | 16 | 732.32  | 442.72 | 197.53 | 104.53 | 1.17 | 0.60 | 5.02 | 1.20 | 13.00 | 7.35 | 1.93 | 1.20 |

UM: ultrarapid metabolizer; RM: rapid metabolizer; NM: normal metabolizer; IM: intermediate metabolizer; PM: poor metabolizer; NF: normal function; DF: decreased function; PF: poor function.
